# Supplementary material for: Atomistics of the lithiation of oxidized silicon (SiOx) nanowires in reactive molecular dynamics simulations
Source: Royal Society of Chemistry journal article supplement (doi:10.1039/c6cp06158c), 2016-01-01
Supplement: c6cp06158c1.pdf [file c6cp06158c1.pdf]

## Electronic Supplementary Information (ESI)

# Atomistics of the Lithiation of Oxidized Silicon (SiO<sub>x</sub>) Nanowires in Reactive Molecular Dynamics Simulations

*Hyun Jung,<sup>†,‡</sup> Byung Chul Yeo,<sup>†</sup> Kwang-Ryeol Lee,<sup>†</sup> and Sang Soo Han<sup>†,\*</sup>*

<sup>†</sup>Center for Computational Science, Korea Institute of Science and Technology (KIST),  
Hwarangno 14-gil 5, Seongbuk-gu, Seoul 136-791, Republic of Korea

<sup>‡</sup>Department of Physics, Hanyang University, 222 Wangsimni-ro, Seongdong-gu, Seoul 133-  
791, Republic of Korea

\*To whom correspondence should be addressed.  
E-mail: sangsoo@kist.re.kr

## **(S1) Development of reactive force field for the Li-Si-O system**

The reactive force field (ReaxFF) parameters of the Li-Si-O system were developed based on the Li-Si parameters<sup>S1</sup> that we have previously developed. For the ternary Li-Si-O system, additional ReaxFF parameters with regard to Si-O and Li-O bonds, etc., are required. Here, the parameters concerning the Si-O bond were obtained from Ref. S2. In this work, we developed the Li-O parameters based on density functional theory (DFT) calculations of Li<sub>2</sub>O and Li<sub>2</sub>O<sub>2</sub> molecules. To calculate the bond dissociation energy of the Li-O bond, we used the hybrid B3LYP functional with the 6-311G\*\* basis set in the Q-Chem<sup>S3</sup> software.

Validation results for the developed Li-O ReaxFF parameters are shown in Figure S1. The developed ReaxFF reproduces the bond dissociation energy for the Li-O bond obtained from the DFT calculations. In addition, the ReaxFF reproduces the Mulliken charge of a Li atom as obtained from the DFT calculations for an optimized Li<sub>2</sub>O molecule (DFT: +0.35e versus ReaxFF: +0.39e) and Li<sub>2</sub>O<sub>2</sub> molecule (DFT: +0.50e versus ReaxFF: +0.50e).

Moreover, in the trainset for developing the ReaxFF, we considered a bond dissociation behavior of Li<sub>4</sub>SiO<sub>4</sub> cluster and an equation of state of the Li<sub>2</sub>O crystal. The results are shown in Figures S2 and S3.

In addition, using the developed ReaxFF, we calculated bulk moduli for c-Si and a-SiO<sub>2</sub>, which is shown in Figure S4. The ReaxFF predicts the bulk modulus of 70.3 GPa for c-Si, which is comparable to experimental (97.6 GPa)<sup>S4</sup> and DFT (88.7 GPa)<sup>S5</sup> values. And, the ReaxFF predicts 47.9 GPa for *a*-SiO<sub>2</sub>, which is also in the reasonable range between the previous experimental (36.7 GPa)<sup>S6</sup> and theoretical (51.5 GPa)<sup>S7</sup> values.

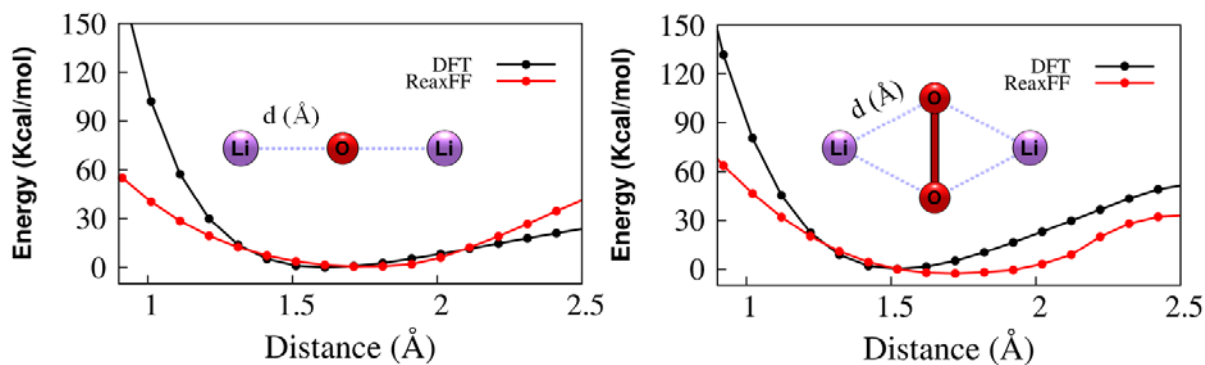

**Figure S1.** Comparison of DFT and ReaxFF through bond dissociation curves of Li-O bond in  $\text{Li}_2\text{O}$  (left) and  $\text{Li}_2\text{O}_2$  (right) molecules.

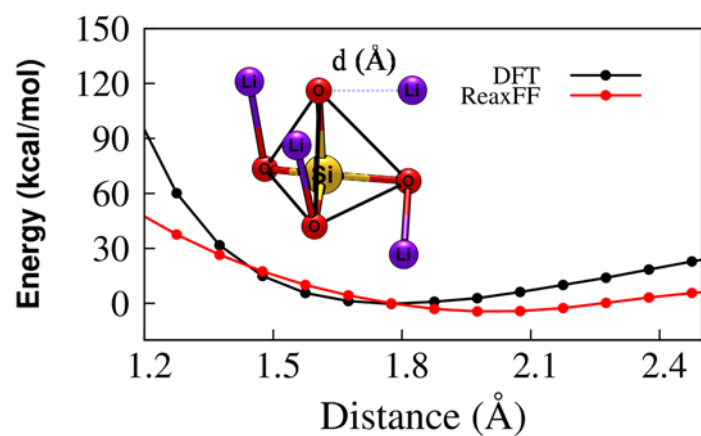

**Figure S2.** Comparison of DFT and ReaxFF through a dissociation curve of the Li-O bond in  $\text{Li}_4\text{SiO}_4$ .

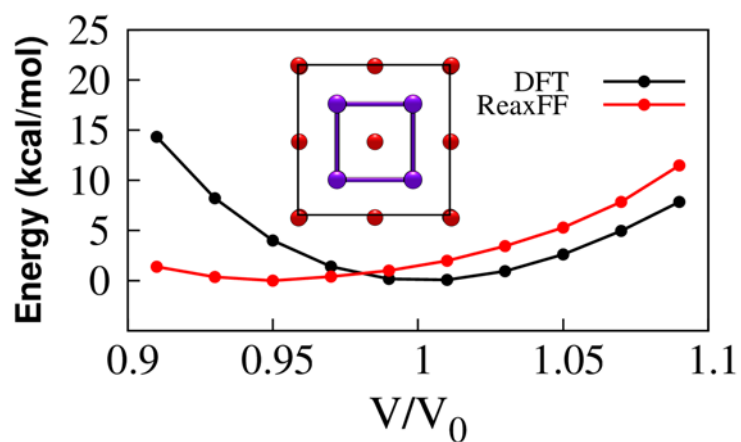

**Figure S3.** Comparison of DFT and ReaxFF through an equation of state of the  $\text{Li}_2\text{O}$  crystal.

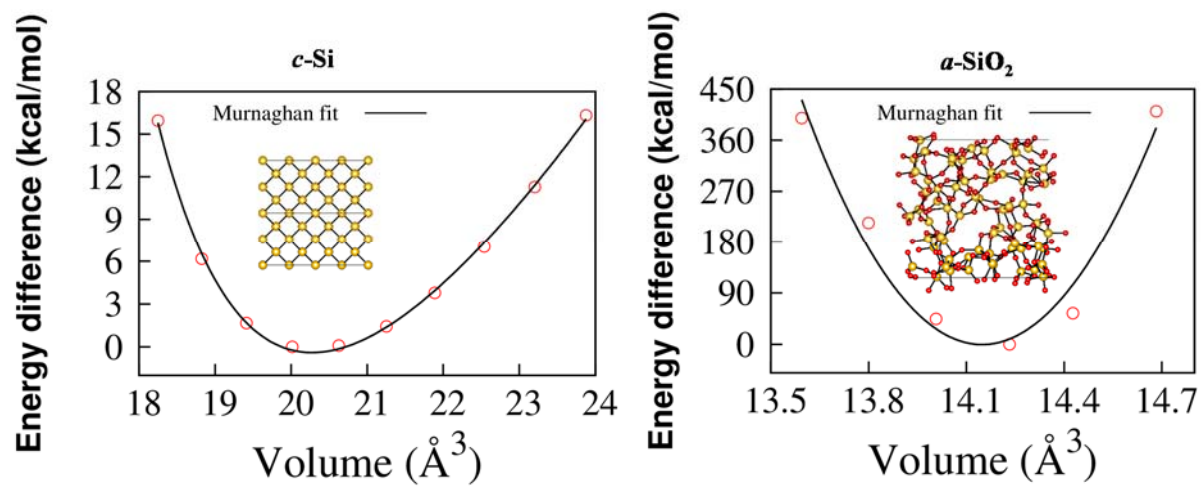

**Figure S4.** Bulk moduli of *c*-Si (left) and *a*-SiO<sub>2</sub> (right) calculated by the developed ReaxFF. Here, in calculating the bulk moduli from the ReaxFF results, the Murnaghan equation is used.

## (S2) Force Field Optimization

For the force field optimization, we used a successive one-parameter search method which was developed by van Duin et al.<sup>S8,S9</sup> The method is used to minimize the sum-of-square error function given as

$$\mathbf{error} = \sum_i \left[ \frac{(\omega_{i,QM} - \omega_{i,ReaxFF})}{\sigma_i} \right]^2$$

where,  $\omega_{i,QM}$  and  $\omega_{i,ReaxFF}$  are DFT and ReaxFF computed values, respectively. And  $\sigma_i$  is the assigned weight in the  $i$ th data point.

### (S3) Production of $\text{SiO}_x$ NWs from ReaxFF-MD simulations

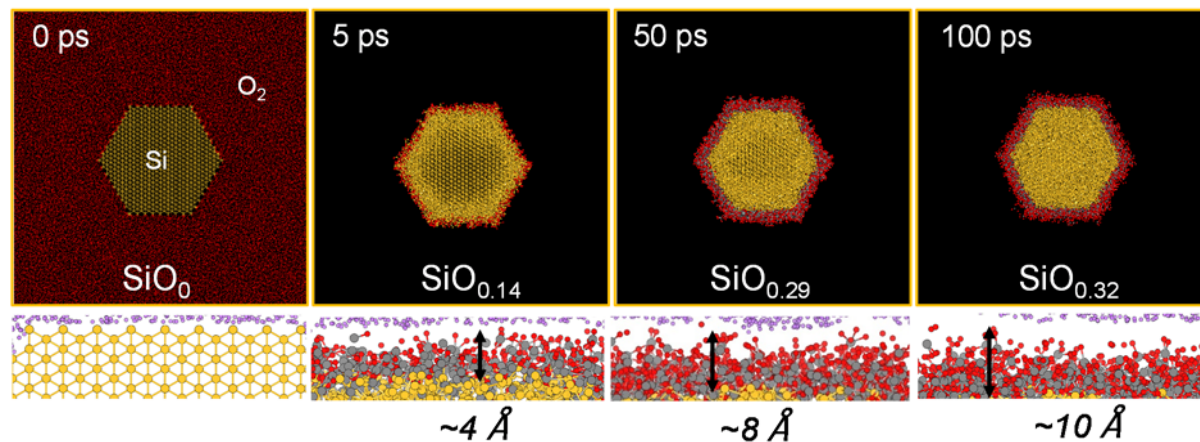

**Figure S5.** The process of preparing  $\text{SiO}_x$  NWs by ReaxFF-MD simulations.

Figure S5 shows the process of preparing  $\text{SiO}_x$  NWs by means of chemical reactions between pristine Si NWs ( $\sim 5$  nm in diameter and  $\sim 10$  nm in length) and  $\text{O}_2$  molecules. A pristine Si NW was immersed in a simulation cell filled with  $\text{O}_2$  molecules with periodic boundary conditions in all directions; the dimensions of the simulation cell were  $105.2 \text{ \AA} \times 105.2 \text{ \AA} \times 97.8 \text{ \AA}$ . ReaxFF-MD simulations at 500 K were then performed to predict the chemical reactions between the Si NW and the  $\text{O}_2$  molecules, for which an MD time step of 0.5 femto seconds (fs) was used. At 500K,  $\text{O}_2$  molecules were easily dissociated on the surface of the Si NW, leading to the formation of silicon oxides. The oxide thickness depended on the oxidation time, with a longer oxidation time leading to a thicker oxide layer. We considered three oxidation times: 5, 50, and 100 ps, resulting in the  $\text{SiO}_{0.14}$ ,  $\text{SiO}_{0.29}$ , and  $\text{SiO}_{0.32}$  NWs, respectively.

(S4) Coordination number

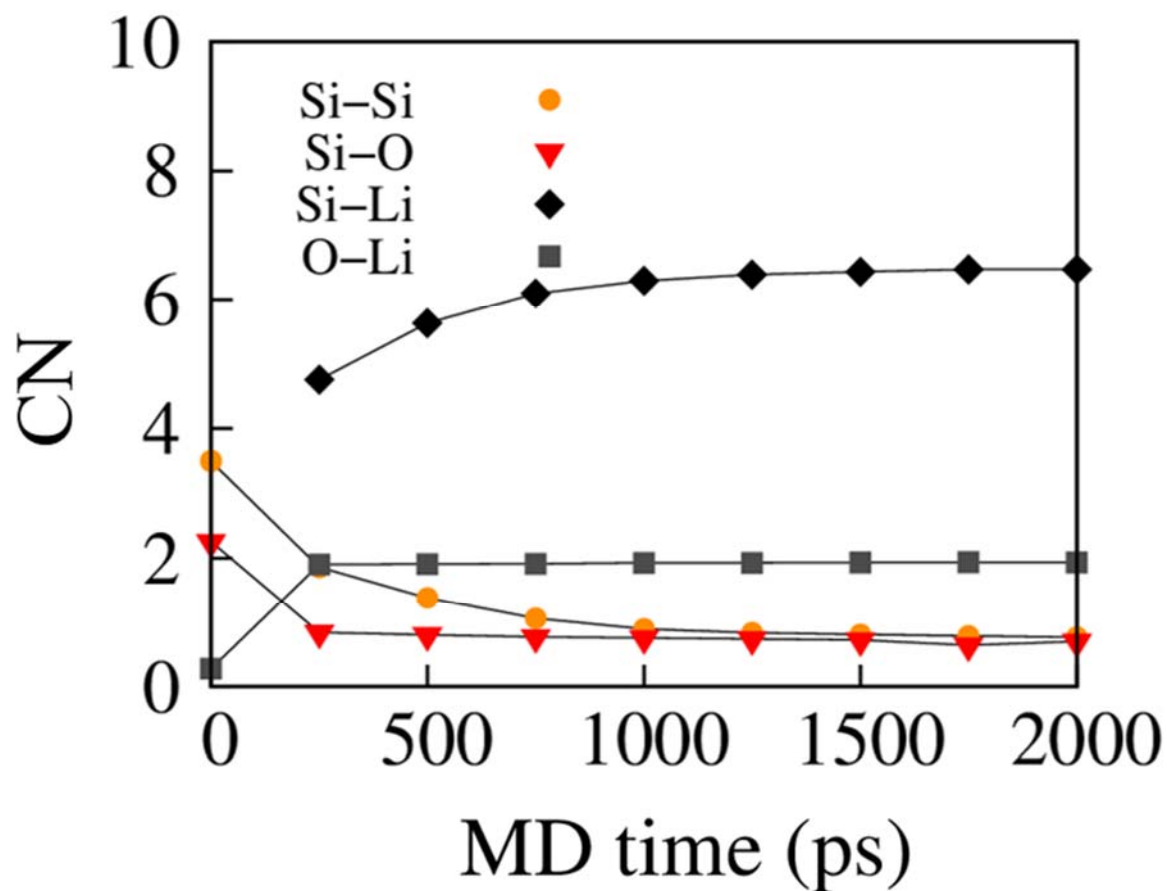

**Figure S6.** Calculated average coordination numbers (CNs) for Si, O, and Li atoms in the  $\text{SiO}_{0.32}$  NW with a MD time. The cutoff radii for  $\text{CN}_{\text{Si-Si}}$ ,  $\text{CN}_{\text{Si-O}}$ ,  $\text{CN}_{\text{Si-Li}}$ , and  $\text{CN}_{\text{O-Li}}$  are 2.40, 1.85, 2.90, and 2.55 Å, respectively.

(S5) Interface mobility

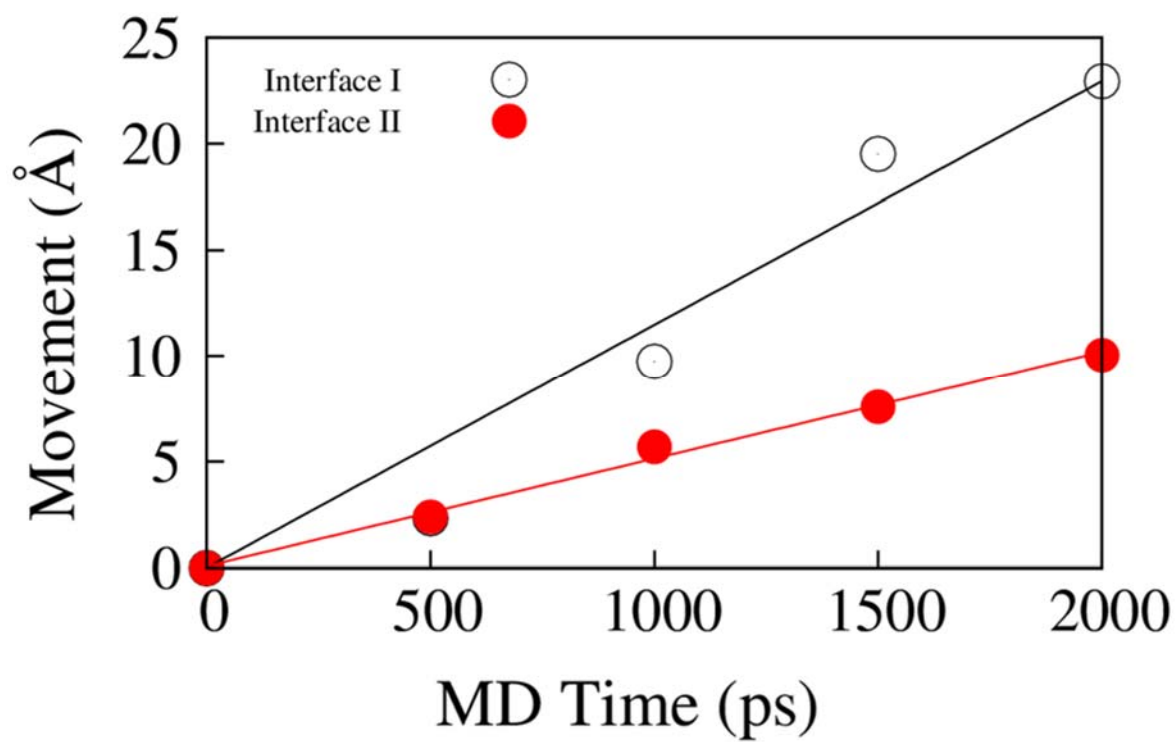

**Figure S7.** The mobility of the interfaces I and II with a MD time.

(S6) Delithiation process simulation

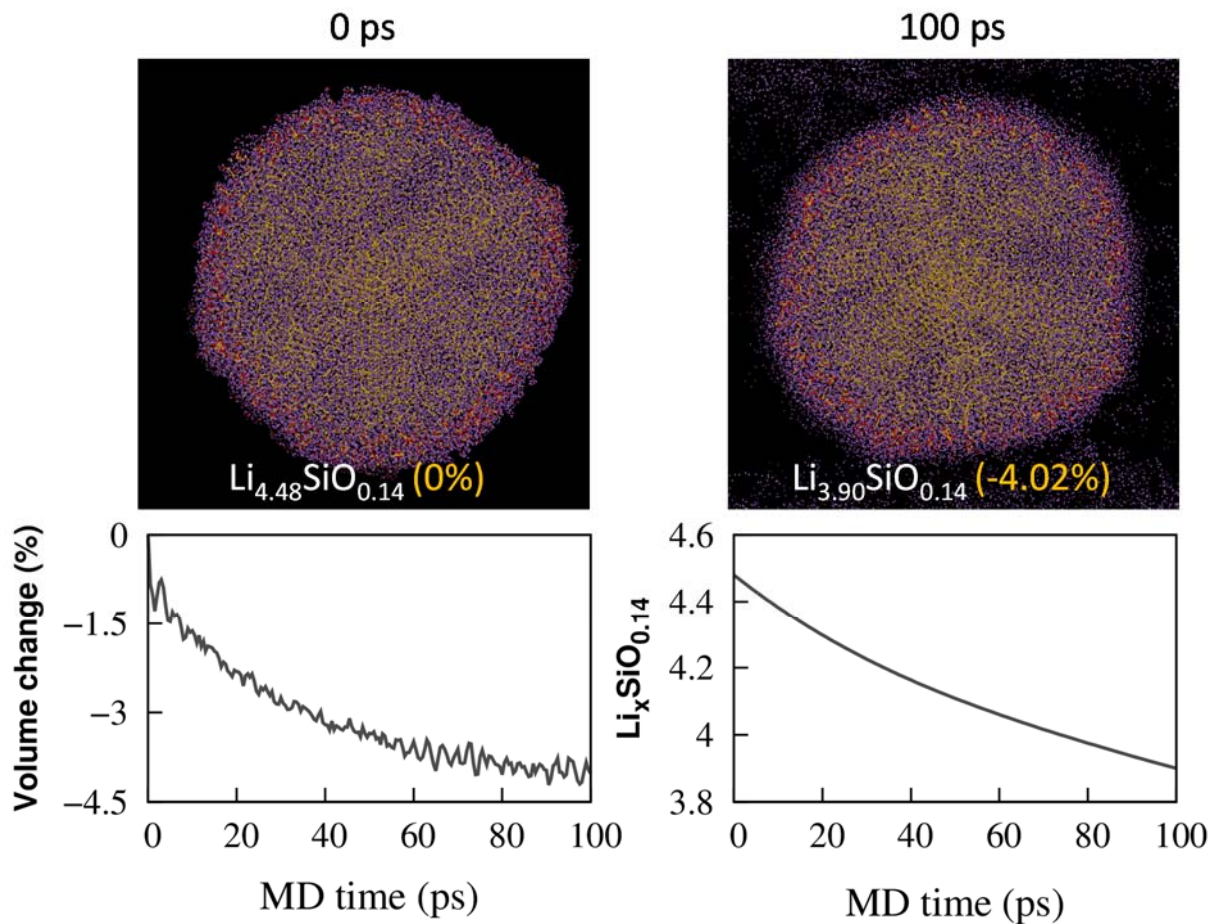

**Figure S8.** MD simulations on the delithiation process of the  $\text{SiO}_{0.14}$  NW, where an external force  $F = qE$  to each charged atom is applied. Here, the color codes are as follows: orange = Si, red = O, and pink = Li.

## References

- [S1] H. Jung, M. Lee, B. C. Yeo, K.-R. Lee, S. S. Han, *J. Phys. Chem. C* 2015, **119**, 3447.
- [S2] A. C. T. van Duin, A. Strachan, S. Stewman, Q. Zhang, X. Xu, W. A. Goddard III, *J. Phys. Chem. A* 2003, **107**, 3803.
- [S3] *Q-CHEM Software*, version 4.1; Q-Chem Inc.; Pittsburgh, PA, **2013**.
- [S4] M. A. Hopcroft, W. D. Nix, T. W. J. Kenny, *J. Microelectromech. Syst.* 2010, **19**, 229.
- [S5] E. Ziambaras, E. Schröder, *Phys. Rev. B* 2003, **68**, 064112.
- [S6] W. H. Wang, *Prog. Mater. Sci.* 2012, **57**, 487–656.
- [S7] L. Si, D. Guo, G. Xie, J. Luo, *ACS Appl. Mater. Interfaces* 2014, **6**, 13850.
- [S8] A. C. T. van Duin, J. M. A. Baas, B. van der Graaf, *J. Chem. Soc. Faraday Trans.* 1994, **90**, 2881-2895.
- [S9] A. Ostadhossein, S.-Y. Kim, E. D. Cubuk, Y. Qi, A. C. T. van Duin, *J. Phys. Chem. A* 2016, **120**, 2114-2127.
